# Supplementary material
Source: ML conference proceedings conference paper supplement (https://proceedings.neurips.cc/paper_files/paper/2020/hash/1abb1e1ea5f481b589da52303b091cbb-Abstract.html)
Supplement: Supplementary file [file 1abb1e1ea5f481b589da52303b091cbb-Supplemental.zip]

# Training deep networks with a biologically plausible algorithm

*Implementation of BrainProp, a biologically plausible learning rule that can train deep neural networks on image-classification tasks (MNIST, CIFAR10, CIFAR100, Tiny ImageNet).*

## BrainProp: How the brain can implement reward-based error backpropagation

This repository is the official implementation of "BrainProp: How the brain can implement reward-based error backpropagation".

In the paper we show that by training only one output unit at a time we obtain a biologically plausible learning rule able to train deep neural networks on state-of-the-art machine learning classification tasks. The architectures used range from 3 to 8 hidden layers.

## Requirements

The current version of the code requires a recent (as of June 2020) version of tensorflow-gpu, CUDA and cuDNN and it was specifically tested on the following versions of the packages:

- Python 3.6.6
- pip 20.1.1
- CUDA 10.1.243
- cuDNN 7.6.5.32

To install the required libraries and modules (after having created a virtual environment with the versions of Python and pip indicated above):

```
pip install -r Requirements.txt
```

## Datasets

- MNIST, CIFAR10 and CIFAR100 are automatically available through keras.
- Tiny ImageNet can be downloaded from the [official page of the challenge](#) or extracted by running:

```
python tinyimagenet.py
```

in the directory where the file "tiny-imagenet-200.zip" is located.

## Training and Evaluation

To train the model(s) in the paper, run this command:

```
python main.py <dataset> <architecture> <algorithm>
```

the training will stop when the validation accuracy has not increased for 45 epochs, otherwise until 500 epochs are reached.

The possible <dataset> - <architecture> combinations are:

- MNIST - {dense, loccon, conv}
- CIFAR10 - {loccon, conv, deep}
- CIFAR100 - {loccon, conv, deep}
- TinyImageNet - deep

For the details of the architectures, please refer to the paper.

For <algorithm>, set BrainProp for BrainProp or EBP for error-backpropagation.

Add the flag -s to save a plot of the accuracy, the trained weights (at the best validation accuracy) and the history file of the training.

To load and evaluate a saved model:

```
python main.py <dataset> <architecture> <algorithm> -l <weightfile.h5>
```

Three pre-trained models (on the deep network with BrainProp) on CIFAR10 (CIFAR10\_BrainProp\_weights.h5), CIFAR100 (CIFAR100\_BrainProp\_weights.h5) and Tiny ImageNet (TIN\_BrainProp\_weights.h5) are included.

All the hyperparameters (as specified in the paper) are automatically set depending on which architecture is chosen.

## Results

All the experiments ran on one node with a NVIDIA GeForce 1080Ti card.

Our algorithm achieved the following performances (averaged over 10 different seeds, the mean and standard deviation are indicated):

| BrainProp | Top 1 Accuracy [%] | Epochs [#] | Seconds/Epoch |
|-----------|--------------------|------------|---------------|
|-----------|--------------------|------------|---------------|

| BrainProp            | Top 1 Accuracy [%] | Epochs [#] | Seconds/Epoch |
|----------------------|--------------------|------------|---------------|
| MNIST - conv         | 99.31(0.04)        | 63(18)     | 3             |
| CIFAR10 - deep       | 88.88(0.27)        | 105(4)     | 8             |
| CIFAR100 - deep      | 59.58(0.46)        | 218(22)    | 8             |
| Tiny ImageNet - deep | 47.50(1.30)        | 328(75)    | 47            |

For the dense and conv simulations the speed was 3s/epoch, while for loccon the speed ranged between 45- and 60s/epoch.

For the complete tables and figures, please refer to the paper.
